# Supplementary material for: Adventitious Shoot Regeneration from In Vitro Leaf Explants of the Peach Rootstock Hansen 536
Source: PubMed Central journal article supplement (PMC7357001; doi:10.3390/plants9060755), 2020-06-16
Supplement: plants-09-00755-s001.pdf [file plants-09-00755-s001.pdf]

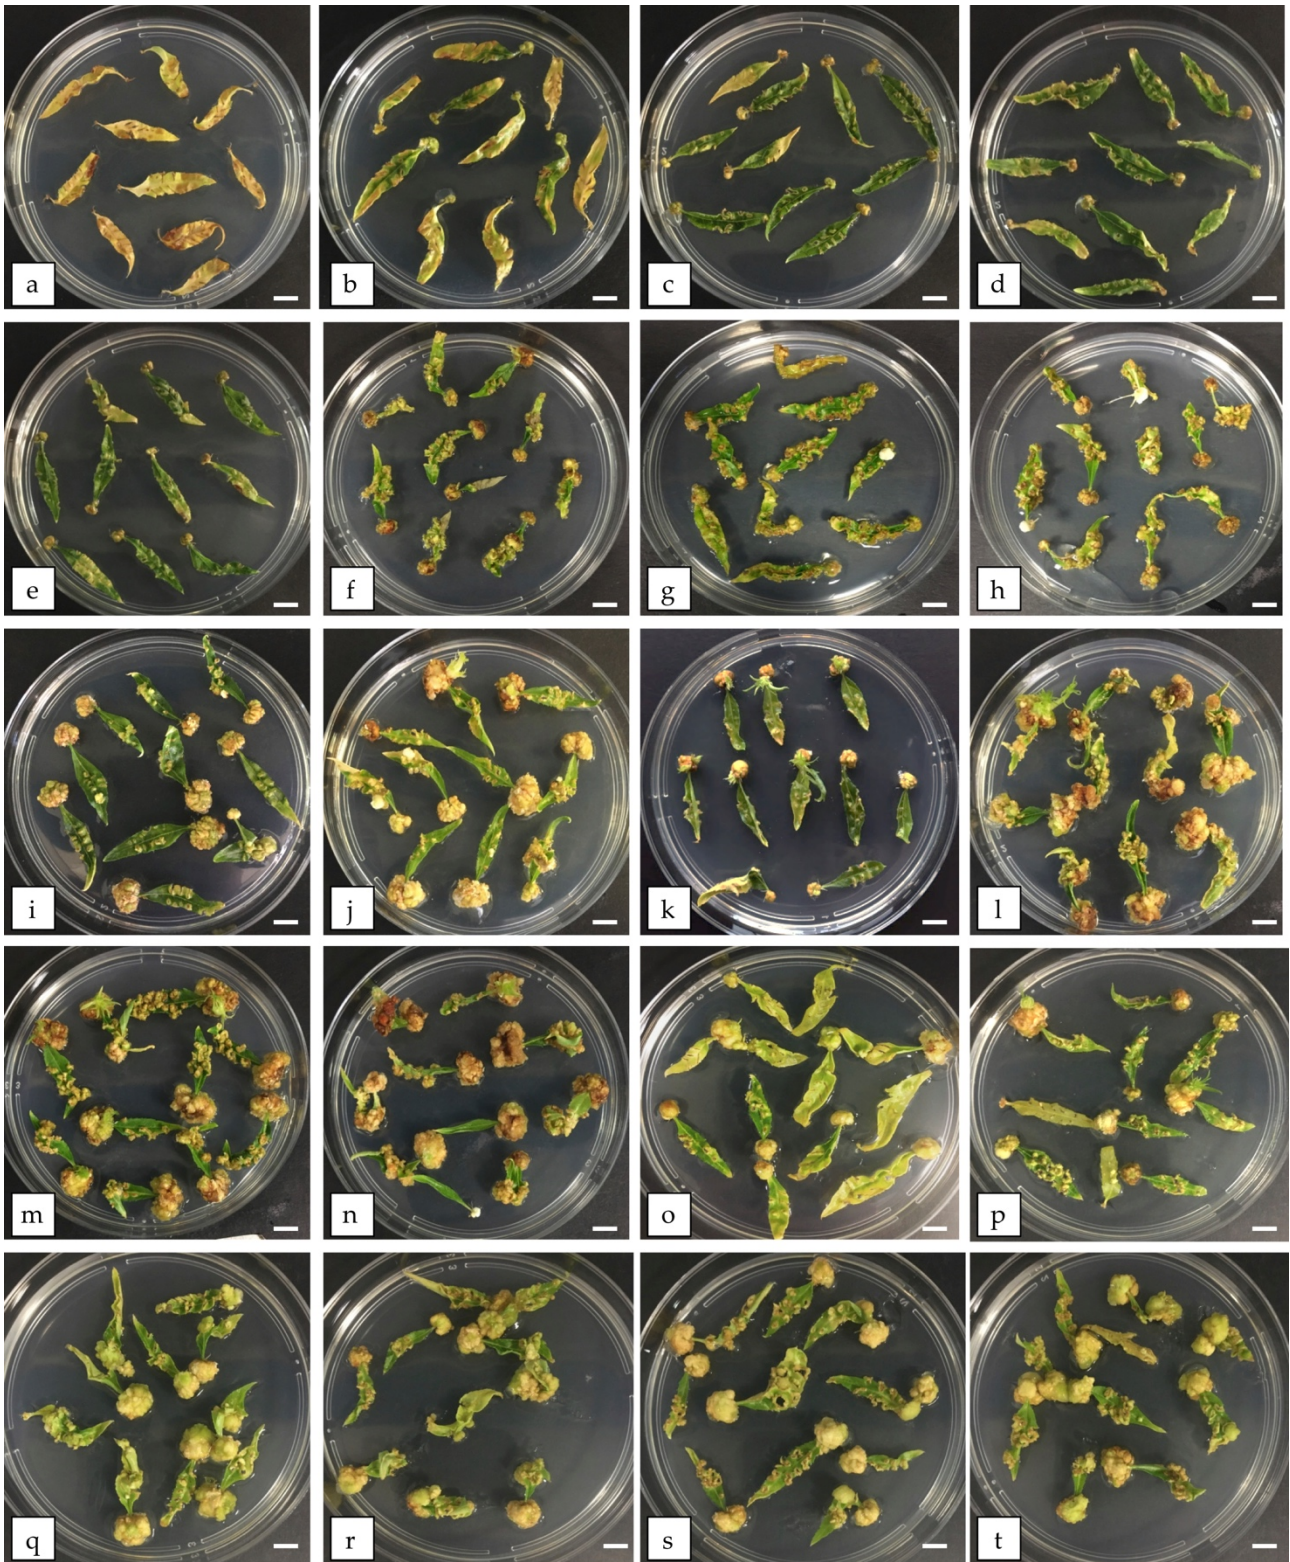

**Supplementary figure 1.** Caulogenesis and leaf regeneration from Hansen 536 explants placed on WPM 1 - WPM 20 (a - t) media after five weeks from the beginning of the experiment (bar = 1 cm).

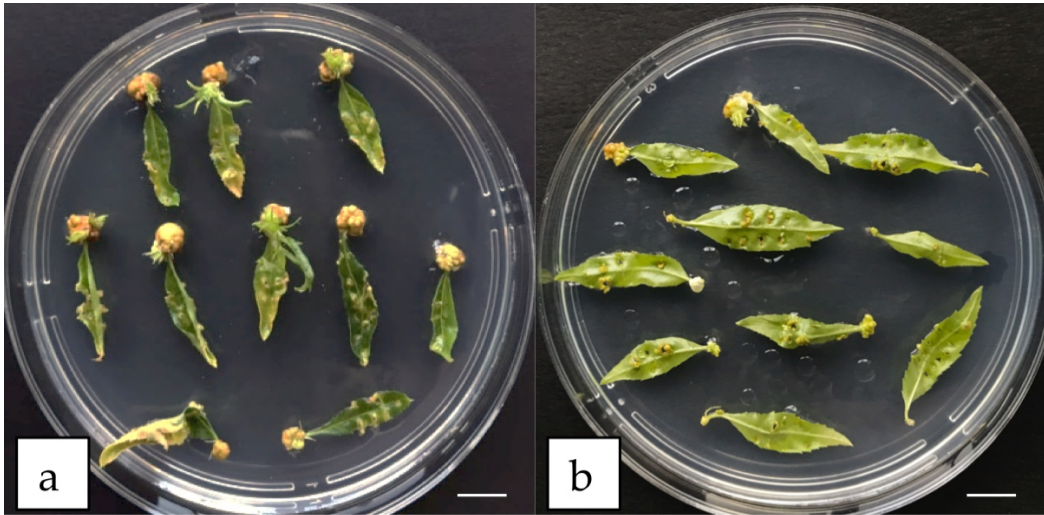

**Supplementary figure 2.** Hansen 536 leaf explants after five weeks of culture with the abaxial side (a) or the adaxial side (b) on WPM11 medium (bar = 1 cm).
